# Supplementary material for: Genome-wide identification, characterization and expression pattern analysis of APYRASE family members in response to abiotic and biotic stresses in wheat
Source: PeerJ. 2019 Sep 11;7:e7622. doi: 10.7717/peerj.7622 (PMC6744936; doi:10.7717/peerj.7622)
Supplement: Table S1 [file peerj-07-7622-s005.xlsx]

## Sheet: Sheet1
Table S1. CDS sequence of the 27 APY candidates
Gene Name	Genome set	Sequence ID	Squence
TaAPY1	A	TraesCS4A01G131300.1	ATGCGCCGCTTCTCGGCCGCCGGCGCGCGCCAGCAGCAAGGGGAGGCCGTCTCCGACCGCCTGCACCGCT ACCGCGGGGTGCTGATGGTGGTGCTCTCGCCGGTGCTCCTCGTCTCCTTCGTGCTCCTCCTCATGCCGCG TTCCCCGGCCTCCGTCACTGGCGGGGCCTCCGGTGTGCTCCTCGCCACTGGAGGCAGGAGGTGGGGACCC CAGGCCGTCGGCGGAGTTGGTGACGGATCGAACAGGTATGCGGTGATATTTGACGCCGGAAGCTCCGGGA GCCGCGTGCACGTGTACTGCTTCGACGAGAGCCTGGATCTTGTTCCTATAGGGAATGCGAtCGAGGTGTT CAAGCAGAAAAAACCAGGCTTGAGTTCTTATGCCAAGGATCCTC…
	B	TraesCS4B01G173300.1	ATGCGCCGCTTCTCGGCCGCCGGCGCGCGGCAGCAGCAGGGGGAGGCCGTCTCCGACCGCCTGCACCGCT ACCGCGGGGTGCTAGTGGTGGTGCTCTCGCCGGTGCTCCTCGTCTCCTTCGTGCTCCTCCTCATGCCGCG CTCCCCGGCCTCCGTCACCGGCGGGGCCTCCGGTGTGCTCGTCGCCACTGGAGGCAGGAGGTGGGGACCC CAGGCCGTCGGTGGAATTGGTGACGGATCGAACAGGTACGCGGTGATATTTGACGCCGGAAGCTCCGGGA GCCGCGTGCACGTCTACTGCTTCGACGAGAGCCTGGATCTTGTTCCTATAGGGAATGCGATCGAGCTGTT CAAGCAGAAAAAACCAGGCTTGAGTTCTTATGCCAAGGATCCTC…
	D	TraesCS4D01G175400.1	ATGCGCCGCTTCTCGGCCGCCGGCGCGCGCCAGCAGCAGGGGGAGGCCGTCTCCGACCGCCTGCACCGCT ACCGCGGGGTGCTGATGGTGGTGCTCTCGCCGGTGCTCCTCGTCTCCTTCGTGCTCCTCCTCATGCCGCG CTCCCCGGCCTCCGTCACCGGCGGGGCCTCCGGCGTGCTCGTCGCCACTGGAGGCAGGAGGTGGGGACCC CAGGCCGTCGGCGGAGTTGGTGACGGATCGAACAGGTACGCGGTGATATTTGACGCCGGAAGCTCCGGGA GCCGCGTGCACGTGTACTGCTTCGACGAGAGCCTGGATCTTGTTCCTATAGGGAATGCGATCGAGCTGTT CAAGCAGAAAAAACCAGGCTTGAGTTCTTATGCCAAGGATCCTC…
TaAPY2	A	TraesCS2A01G102100.1	ATGCGCCGCTACTCGCAGCTGCCGGGCGCCGGCCGCCAGGACACGCTCGCCGACCGCGTGCACCGCTACC GCGGGGTGCTGCTCGTAGTGCTCGCGCCGCTCGCCCTCGTCTCGCTCGTGCTCCTGCTCATGCCGCGCGC GCCCGCCGGGGCCGCCCAGAGGCCCCTGGGAGGAGGGGCCGGGGCCGCCGGGGGTAAGAAGTACGCCGTC ATATTCGACGCCGGCAGCTCCGGCAGCCGCGTCCACGTCTTCTGCTTCGATGGCAACCTGGATCTGGTCC ACATTGGCACCGACATCGAGCTCTTCGTCCAGAAAAAGCCTGGACTTAGCGCGTACGCCCAGGACCCGCG CGAGGCTGCTCAATCGCTCGTCTCCCTCATTGAGAAGGCCAAGG…
	B	TraesCS2B01G119200.1	ATGCGCCGCTACTCGCAGCTGCCGGGCGCCGGCCGCCAGGACACGCTCGCCGACCGCGTGCACCGCTACC GCGGGGTGCTGCTCGTCGTGCTCGCGCCCCTCGCCCTCGTCTCGCTCGTGCTCCTCCTCATGCCGCGCGC GCCCGCCGGGGCCGCCCAGAGGCCCCTGGGAGGAGGGGTCGGCGCCGCCGCCGCCGGGGGTAAGAAGTAC GCCGTCATATTCGACGCCGGCAGCTCCGGCAGCCGCGTCCACGTCTTCTGCTTCGACGGCAACCTGGATC TTGTCCACATTGGCACCGACATCGAGCTCTTCGTCCAGAAAAAGCCTGGACTTAGCGCGTACGCCCAGGA CCCGCGCGAGGCTGCTCAATCGCTCGTCTCCCTCATTGAGAAGG…
	D	TraesCS2D01G101500.1	ATGCGCCGCTACTCGCAGCTGCCGGGCGCCGGCCGCCAGGACACGCTCGCCGACCGCGTGCACCGCTACC GCGGGGTGCTGCTCGTCGTGCTCGCGCCGCTCGCCCTCGTCTCGCTCGTGCTCCTGCTCATGCCGCGCGC GCCCGCGGGGGCCGCCCAGAGGCCCCTCGGAGGAGGGGCCGGGGCCGCCGGGGCTAAGAAGTACGCCGTC ATATTCGACGCCGGCAGCTCCGGCAGCCGCGTCCACGTCTTCTGCTTCGACGGCAACCTGGATCTGGTCC ACATTGGCACCGACATCGAGCTCTTCGTCCAGAAAAAGCCTGGACTTAGCGCGTACGCCCAGGACCCGCG CGAGGCTGCTCAATCGCTCGTCTCCCTCATTGAGAAGGCCAAGG…
TaAPY3-1	A	TraesCS5A01G532000.1	ATGGCTCACCATGCCTCGGGCGTCCTCCTCTTCCTCCTCATGGCCTTCTCGTTCGCCGGCTCCGCCTTTG CGGCCGACGCGGCGGTGCTCGGCCGGAAGGCCGGTATTGGCGCCGTTGCCGAGGAGGAGCCCGAGCTGAA GAAGGCGGCGCCCGGGAAGTACGCGGTGATCTTCGACGCGGGCAGCACGGGCACGCGCGTCCACGTCTTC CAGTTCGACAAGAAGATGGAGCTCATCGACATTGGCGACGGCGACGACATCGAGGTCTTCGCCAAGGTGG AGCCGGGGCTGAGCGCGTACGCCGGACGGCCGCAGGAGGCGGCCAAGTCCATCGTGCCTCTGCTGGAGAA GGCCAAGAGCACCGTGCCTCGCTGGCTCATGAAGAAAACTCCCG…
	B	TraesCS4B01G363700.1	ATGGTTCGTCATGCCTCGGGCCTCCTCCTCCTCCTCCTCCTCGTGGCCCTCTCGTTCGCCGGCTCGGCCT TTGCCGCCGACGTGGCTGTGCTCGGCCGGAAGGCCGGTATTGGGGCCGTTGCCGAGGAGGAGCCCGAGCT GAAGAAGGCGGCCGGGAAGTACGCGGTGATCTTCGACGCGGGCAGCACGGGCACGCGCGTCCACGTCTTC CGGTTCGACAAGAAGATGGAGCTCATCGACATTGGCGACGGCGACGACATCGAGGTCTTCGCCAAGGTGG AGCCGGGGCTGAGCGCGTACGCCGGCCGGCCGCAGGAGGCGGCCAAGTCCATCGTGCCTCTGCTGGAGAA GGCCAAGAGCACCGTGCCCCGCTCGCTCATGAAGAAAACGCCCG…
	D	TraesCS4D01G357100.1	ATGGCTCAGGCTCATCATGCCTCGAGCGTCCTCCTCCTCCTCCTCGTGGCCTTCTCGTTCGCCGGCTCCG CCTTTGCCGCCGACGTGGCGGTGCTCGGCCGGAAGGCCGGTATTGGCGCCGTTGCCGAGGAGGGGCCCGA GCTGAAGGCGGCGCCCGGGAAGTACGCGGTGATCTTCGACGCGGGCAGCACGGGCACGCGCGTGCACGTC TTCCGGTTCGACAAGAAGATGGAGCTCATCGACATCGGCGACGGCGACGACATCGAGGTCTTCGCCAAGG TGGAGCCGGGGCTGAGCGCGTACGCCGGACGGCCGCAGGAGGCGGCCAAGTCCATCGTGCCTCTGCTGGA GAAGGCCAAGAGCACCGTGCCCCGCTGGCTCATGAAGAAAACGC…
TaAPY3-2	A	TraesCS5A01G547700.1	ATGGCTCGCGTCGTTGCCGCGGCACCGCTTCTCCTCCTCCTGCTTGCTTCGTCGTCCGCGGCCTTTGCCG ACACGGTGCTCGGCCGCAAAGGCAGTACCGCGGCGGAGGGGCCCGTGCAGTTTCCGGGGGTGGGCAAGTA CGCCGTGATCTTCGACGCCGGGAGCACGGGCACACGCGTGCACGTCTTCAAGTTTGACAACAAGATGGAC CTCCTTGAGATCGGCGACGACATCGAGGTCTTCGCCAAGGTGTCCCCCGGGCTGAGTTCCTTCTCCGGGC GGCCCAAGGAGGCTGCAAAGTCCGTGATACCACTGCTCGACAAGGCAAACAGTGTCGTCCCTTGGTGGCA AATGAACAGAACTCCCCTTAAACTAGGAGCGACGGCTGGGCTGA…
	B	TraesCS4B01G381600.1	ATGGTGCTCGGCCGCAAAGGCAGTACCGCGGTGGAGGGGCCTGTGCAGTTTCCGGGGGTGGGCAAGTACG CCGTGATCTTCGACGCCGGGAGCACGGGCACGCGTGTGCACGTCTTCAAGTTTGACAACAAGATGGATCT CCTTGAGATCGGCGACGACATCGAGGTCTTCGCCAAGGTGTCCCCCGGGTTGAGCTCCTTCTCTGGACGG CCGAAGGAGGCTGCAAAGTCCATGATACCACTGCTCGACAAGGCAAACAGCGTCGTCCCTTGGTGGCAAA TGAACAGAACTCCCCTTAAACTAGGGGCGACGGCTGGGCTAAGACTCATCGGAGATAAGCCATCAGAGCA GATCCTTCAAGCGGTGAGGGATATCGTCCACACCAAGAGCAAAT…
	D	TraesCS7D01G162100.1	ATGGCTCATGCCTTGGGCATCATCCTCCTCCTCCTGCTCTCCTTGTTCGCCAGCTCTGCCCTCTCCGACG CGGTGCTCGGACGGAAGGCCGGCGTCATTCTCGAGGAGCCCAAGCTGGTGGCAGCCCCAGGGAAGTACGC TGTGATCTTCGACGCCGGTAGCACGGGCACACGTGTCCATGTCTTCCAGTTTGACAAGAAGATGGACCTC GTCGAGATCGGTGACGACATCGAGGTCTATGCCAAGTGGGAACCAGGACTGAGTTCATATGCCGGACGGC CACAAGAAGCGGCCAAGTCTATCATACCTCTGCTTGACAAGGCCAAGAGCACTGTGCCTCGGTGGCTCAT GGGAAAAACACCCGTTAAACTAGGGGCCACGGCCGGACTCAGGC…
TaAPY3-3	A	TraesCS7A01G160900.1	ATGGCTCATGCCTTGGGCATCCTCCTCCTCCTCCTCCTCCTGGTCTCCTCGTCCGCCAGCTCTGCCTTCG CCGACTCAGTGCTCGGACGGAAGGCCGGCGTCATTCTCGAGGAGCCCAAGCTGGTGGCGACGCCAGGGAA GTACGCCGTGATCTTTGACGCTGGTAGCACGGGCACGCGTGTCCATGTCTTTCAGTTTGACAAGAAGATG GACCTCGTCGAGATCGGCGACGACATCGAGCTCTATGCCAAGGTGGAACCGGGACTGAGTTCATATGCCG GACGGCCACAAGAAGCGGCCAAGTCTATCATACCTCTGCTTGACAAGGCCAAGAGCACTGTGCCTCGGTG GCTCATGGGAAAAACACCCGTTAAACTAGGGGCCACGGCCGGAC…
	B	TraesCS2B01G025000.1	ATGGCTCACGCCCTGGGCATCCACACACTTGTCCTCCTCCTCCCCCTCCTCCTGGCCTCTTCGTCCGTGT CTGCCGATGTCGTGCTTGGCCGGAAGGCTGGTGGTGCTGTCGAGGCACGGCCGGCACCGGGGAAGTACGC GGTCATCATGGATGCCGGCAGCACTGGCACCCGCGTCCACGTCTTCCGGTTCGACAAGAGGATGGAGCTC GTCGACGTTGGCGACGACATAGAGGTCTTCGCCACGGTGAATCCCGGGCTGAGCTCGTATGCCGGACGGC CACAGGAGGCTGCCAACTCCATCGTACCCCTGCTTGAGAAGGCCAACAGCGCTGTGCCTCGGTCGCTCAT GAAGAGGACACCCGTTAAGCTTGGGGCGACGGCCGGACTAAGAC…
	D	TraesCS2D01G020200.2	ATGGCTCACGCCCTGGGCATCCACTCACTTCTCCTCCTCCTCCTCCTCCTGGCCTCTTCGGCGGCGTCTA CCGACATCGTACTTGGCCAGAAGGCCGGCGCGGCTGTGGAGGCACGGCCAGGACCGGGGAAGTACGCAGT GATCATGGATGCCGGCAGCACTGGCACCCGCGTCCACGTCTTCAGGTTCGACAAGAGGATGGAGCTCGTC GACGTTGGCGGCGACATTGAGGTCTTCGCCACGGTGAATCCGGGACTGAGCTCGTACGCCGGACGGCCAC AGGACGCTGCCAACTCCATCATGCCTCTGCTTGAGAAGGCCAACACCGCTGTGCCTCGGTCACTCATGAA GAGAACACCCATTAAACTTGGGGCGACGGCTGGACTCAGACTCA…
TaAPY3-4	A	TraesCSU01G095000.1	ATGGCTCACCTGGTGGCTACCATGGCGCTTCTCCTCCCCCTCCTCGCCGCGTCGGCAGAGATAGCCCAGGCGCGCGCAGCTGCGGTGCCGCCGCCGCCGGGGAAGTACGCCGTGATCTTGGACGCCGGTAGCACGGGGACGCGTATGCACGTCTTCCGGTTCGACAAGCGGATGGATCTCGTCAAGATCGGCGACGATATCGAGGTCTTCGCCAAGGTGAATCCTGGTCTGAGTTCGTACGCTGGACGGCCCAAGGAGGCTACCAAGTCCATACAACCACTGCTTCAAAAGGCCAACAGCGTCGTGCCACAGAGGCTTATGAAAACGACTCCCGTCAAACTTGGGGCGACGGCCGGACTCAGGCTCATCGGAGATAAGCAAGCAAAGCAGATACTCGAC…
	B	TraesCS7B01G004400.2	ATGGCTCACCTGGTGGGCATGATGGCGCTTCTCCTCCTCCTCGCAGCGTCGGCAGAACAGCCCAGGCGCGCGCCGCCAGGGGGCCGCCGGCGGGGAAGTACGCCGTGATCTTGGACGCCGGCAGCACCGGGACACGTATGCACGTCTTCCGGTTTGACAAGCAGATGGATCTCGTCAAGATCGGCGATGACATCGAGGTCTTTGCCAAGGTGAATCCTGGTCTGAGTTCGTACGCTGGACGGCCCAAGGAGGCTACCAAGTCCATACAACCACTGCTTGAAAAGGCAAACAGCGTCGTGCCTCAGATGCTTATGAAGACTACTCCCGTTAAACTTGGGGCGACGGCCGGACTCAGGCTCATCGGAGATAAGCAAGCAAAGCAGATACTTGACGCGGTCA…
	D	TraesCS7D01G100000.1	ATGGCTCACCTGCTGGGCATGGTGGCGCTTCTCCTCCTCCACGCAGCGTCGGCAGAATAGCCCAGGCGC GTGCGGCGGAGGGGAAGTACGCCGTGATCTTGGACGCCGGCAGCACCGGGACGCTATGCATGTCTTCCGGTTCGACAAGCGGATGGATCTAGTCAAGATCGGCAACGATATCGAGGTCTTCGCCAAGGTGAATCCTGGTCTGAGTTCGTACGCTGGACGCCCCAAGGAGGCTAGCAAGTCCATGCTACCGCTGCTTCAAAAGGCCAACAGCGTTGTGCCTCAGAGGCTTATGAAAACAACTCCCGTTAAACTCGGGGCCACGGCCGGACTCAGGCTCACGGAGATAAGCAAGCAAAGCAGATACTTGACGCGGTCAGGGGCGCTGTCCA…
TaAPY5	A	TraesCS6A01G105900.1	ATGCCGGAGCCCACCAAGCCCCTCTCCCCCCGCGCAAGCCGCGGCCGCTGCCGCCTCTGCGGCCTCTGCC TCGGCTCCGCCCTCCTCGCCATCGTCGTCTCCACCCTCGTCCACCTCCTCTCCCCGCCGCCTCAGCCGGC CCCCTCCCCGAGCTTCTCCATCATCATAGACGGCGGCAGCACCGGTACCCGGGCCCACGTGTTCTCCTTG GGGCCCGACGGCCGGCCGGATCTGGCGCGCTCCGCCGTGATGCGCGTCTCCCCGGGGCTCTCCTCTTTCG CCGCGGACACGGCGTGCGCAGGGGAGTCGCTGCGGCCGCTGTTGGAATTTGCCAAGGAGAAGGTAGGGAG CGAGGGGGCCGCCGCAGCAACAGAGGTGCGGCTGATGGCAACCG…
	B	TraesCS7B01G178800.1	ATGTGCCGCACTAAAGCCCGCGTCGAGCCGCGTGCCCAAGCACTGGAACAAACCCTAACTCCTACCCCCG CATCCAAGATGGTTGCCCAACGGCAACGATCCAGTTCATGTAGCAGCCGCCGCCACCTCGCCGGCTCTCT CATGTTCCTCGCGACGACCGCCTTCGCGCTCCTCCTCCCCCGCTCGTCGCCCCTCAGCTATGGCATCGTT ATTGACGCCGGCAGCACGGGGAGCCGCGTCCACGTCATCACCTACCACGCGGGCGCGCTCCTGCAGCTGG ATTGGTCGCGCACGTCGTCACTGAAGGCCACCCCTGGTTTGTCCTCGTTCGCAGCCGACCCAGGCAGCGG GGGCCTGTCGATCGCCCCGCTATTGGAGTTCGCAAGGCGGCACG…
	D	TraesCS7D01G280900.1	ATGTGCCGCACCAAAGCCCGCGTCGAGCCGCGTGCCCAAGCACTGGAACAAACCCTAACTCCTACCCCCG CATCCAAGATGGTCGCCCAACGGCAACGCTCCAGTTCATGTAGCAGCCGCCGCCACCTCGCCGGCTCTCT CATGTTCCTCGCGACGACCGCCTTCGCGCTCCTCCTCCTCCCCCGCTCGTCGCCCCTCAGCTATGACATC GTTATTGACGCCGGCAGCACGGGGAGCCGCGTCCACGTCATCACCTACCACGCGGGTGCGCTCCCGCAGC TGGATTGGTCGCGCACGTCGTCACTGAAGGCCACCCCTGGTTTGTCCTCGTTCGCAGCCGACCCAGGCAG CGGGGGCCTGTCGATCGCCCCGCTGTTGGAGTTCGCAAGGCGGC…
TaAPY6	A	TraesCS6A01G105900.2	ATGCCGGAGCCCACCAAGCCCCTCTCCCCCCGCGCAAGCCGCGGCCGCTGCCGCCTCTGCGGCCTCTGCC TCGGCTCCGCCCTCCTCGCCATCGTCGTCTCCACCCTCGTCCACCTCCTCTCCCCGCCGCCTCAGCCGGC CCCCTCCCCGAGCTTCTCCATCATCATAGACGGCGGCAGCACCGGTACCCGGGCCCACGTGTTCTCCTTG GGGCCCGACGGCCGGCCGGATCTGGCGCGCTCCGCCGTGATGCGCGTCTCCCCGGGGCTCTCCTCTTTCG CCGCGGACACGGCGTGCGCAGGGGAGTCGCTGCGGCCGCTGTTGGAATTTGCCAAGGAGAAGGTAGGGAG CGAGGGGGCCGCCGCAGCAACAGAGGTGCGGCTGATGGCAACCG…
	B	TraesCS6B01G135200.1	ATGCGGGAGCCCACCAAACCCCTCTCCCCCCGCCCAAGCCGCGGCCGCTGCCGCCTCTGCGGCCTCTGCC TCGGCTCCGCCCTCCTCGCCATCGTCGTCTCCACCCTCGTCCACCTCCTCTCCCCGCCACCTCAGCCTGC GCCCTCCCCGCGCTTCTCCGTCATCATAGACGGCGGCAGCACCGGTACCCGGGCCCACGTGTTCTCCTTG GGGCCCGACGGCCGGCCGGATCTGGCGCGCTCCGCCGTGATGCGCGTCTCCCCGGGGCTCTCCTCTTTCG CTGCGGACACGGCGCGCGCGGGGGAGTCGCTGCGGCCGCTGTTGGAATTTGCCAAGGAGAAGGTAGGGGG CGAGGGGGCCGCCGCAGCAACAGAAGTGCGGCTGATGGCAACCG…
	D	TraesCS6D01G094400.2	ATGCGGGAGCCCACCAAACCCCTCTCCCCCCGCCCAAGCCGCGGCCGCTGCCGCCTCTGCGGCCTCTGCC TCGGCTCCGCGCTCCTCGCCATCGTCGTCTCCACCCTCGCCCACCTCCTCTCCCCGCCGCCTCAGCCTGC CCCCTCCCCGAGCTTCTCCGTCGTCATAGACGGCGGCAGCACAGGTACCCGGGCCCACGTATTCTCCCTG GGGCCCGACGGCCGGCCGGATCTGGCGCGCTCCGCCGTGATGCGCGTCTCCCCGGGGCTCTCCTCTTTCG CCGCGGACACGGCGCGCGCGGGGGAGTCGTTGCGGCCGCTGTTGGAATTTGCCAAGGACAAGGTAGGGGG CGAGGGGGCCGCCGCAGCGACAGAGGTGCGGCTGATGGCAACCG…
TaAPY7	A	TraesCS1A01G288900.1	ATGCGGCTTTCTTCTTCTCTTCAAGATTTGCCAACTTTCTCCAGAATTGAAACTTTAGAAAGGGGCTCTA GCATTGGTGGTGATCTGAGCTCAGGGCGTGCGAAGCCTGTCCGCACACTTCAAAGAGAAGGTCCTGTAGC AAGCTTTTCCAAAGAGAGAACGCCCCCATCGTCACCAACAAATCGAAAGAAATGGATGAGAACAGTTGGT TGGGCTGTTGGTCTGATCCTATTGCTGTGCTTCATATACGCTTCTTTGAGATATTTCCATGTCTTTCTCT CAGAAGGTAGCTCTGAATACTATGTGATTCTTGATTGTGGCAGCACTGGTACAAGAGTGTATGTTTACGA GTGGTCCATCAATCATAATGATGGAAATTCATTTCCTATTGCTT…
	B	TraesCS1B01G298200.1	ATGCGGCTTTCTTCTTCTCTTCAAGATTTGCCAACTTTCTCCAGAATTGAAACTTTAGAAAGGGGCTCTA GCATTGGTGGTGATCTGAGCTCAGGGCGTGCGAAGCCTGTCCGCACGCTTCAAAGAGAAGGTCCTGTAGC AAGCTTTTCCAAAGAGAGAACGCCCCCATCGTCACCAACAAATCGAAAGAAATGGATGAGAACAGTTGCT TGGGCTGTTGGTCTGATCCTATTGGTGTGCTTCATATATGCTTCTTTGAGATATTTCCATGTCTTTCTCT CAGAAGGTAGCTCTGAATACTATGTGATTCTTGATTGTGGCAGCACTGGTACAAGAGTGTATGTTTACGA GTGGTCCATCAATCATAATGATGGAAATTCATTTCCTATTGCTT…
	D	TraesCS1D01G287900.1	ATGCGGCTTTCTTCTTCTCTTCAAGATTTGCCAACTTTCTCCAGAATTGAAACTTTAGAAAGGGGCTCTA GCATTGGTGGTGATCTGAGCTCAGGGCGTGCGAAGCCTGTCCGCACACTTCAAAGAGAAGGTCCTGTAGC AAGCTTTTCCAAAGAGAGAACGCCCCCATCATCACCAACAAATCGAAAGAAATGGATGAGAACAGTTGGT TGGGCTGTTGGTCTGATCCTATTGGTGTGCTTCATATATGCTTCTTTGAGATATTTCCATGTCTTTCTCT CAGAAGGTAGCTCTGAATACTATGTGATTCTTGATTGTGGCAGCACTGGTACAAGAGTGTATGTTTATGA GTGGTCCATCAATCATAATGATGGAAATTCATTTCCTATTGCTT…
