# Supplementary material for: Genome-wide identification, characterization and expression pattern analysis of APYRASE family members in response to abiotic and biotic stresses in wheat
Source: PeerJ. 2019 Sep 11;7:e7622. doi: 10.7717/peerj.7622 (PMC6744936; doi:10.7717/peerj.7622)
Supplement: Table S2 [file peerj-07-7622-s006.xlsx]

## Sheet: Sheet1
Table S2. List of the species used in the phylogenetic analysis
Species name	Number
Aegilops-tauschii subsp	6
Brachypodium_distachyon	6
Lolium_perenne	1
Triticum_urartu	1
oryza sativa Japanese	8
Sorghum bicolor	7
Setaria italica	6
zea mays	6
Phoenix dactylifera	7
Oryza brachyantha	3
Panicum hallii	4
Glycine soja	1
trifolium repens	1
Ananas comosus	4
Elaeis guineensis	1
Nelumbo nucifera	3
Jatropha curcas	1
Quercus suber	1
ziziphus jujuba	2
Ricinus communis	2
citrus sinensis	2
citrus clementina	5
mucuna pruriens	1
populus trichocarpa	1
populus tomentosa	1
Malus domestica	2
Pyrus bretschneideri	1
Cucurbita maxima	1
Prunus persica	1
Cucurbita moschata	2
Capsicum baccatum	1
Phalaenopsis_equestris	1
Cicer arietinum	1
Lupinus angustifolius	2
Glycine max	1
Nicotiana tabacum	1
Nicotiana attenuata	1
Mimosa pudica	1
Dichanthelium Oligosanthes	1
populus euphratica	2
Nicotiana sylvestris	1
cucurbita pepo	1
Prunus mume	1
